# Supplementary material for: Herbal Tea for the Management of Pharyngitis: Inhibition of Streptococcus pyogenes Growth and Biofilm Formation by Herbal Infusions
Source: PubMed Central journal article supplement (PMC6783935; doi:10.3390/biomedicines7030063), 2019-08-24
Supplement: biomedicines-07-00063-s001.pdf [file biomedicines-07-00063-s001.pdf]

Supplementary Materials: Figure S1: S2 and S3.

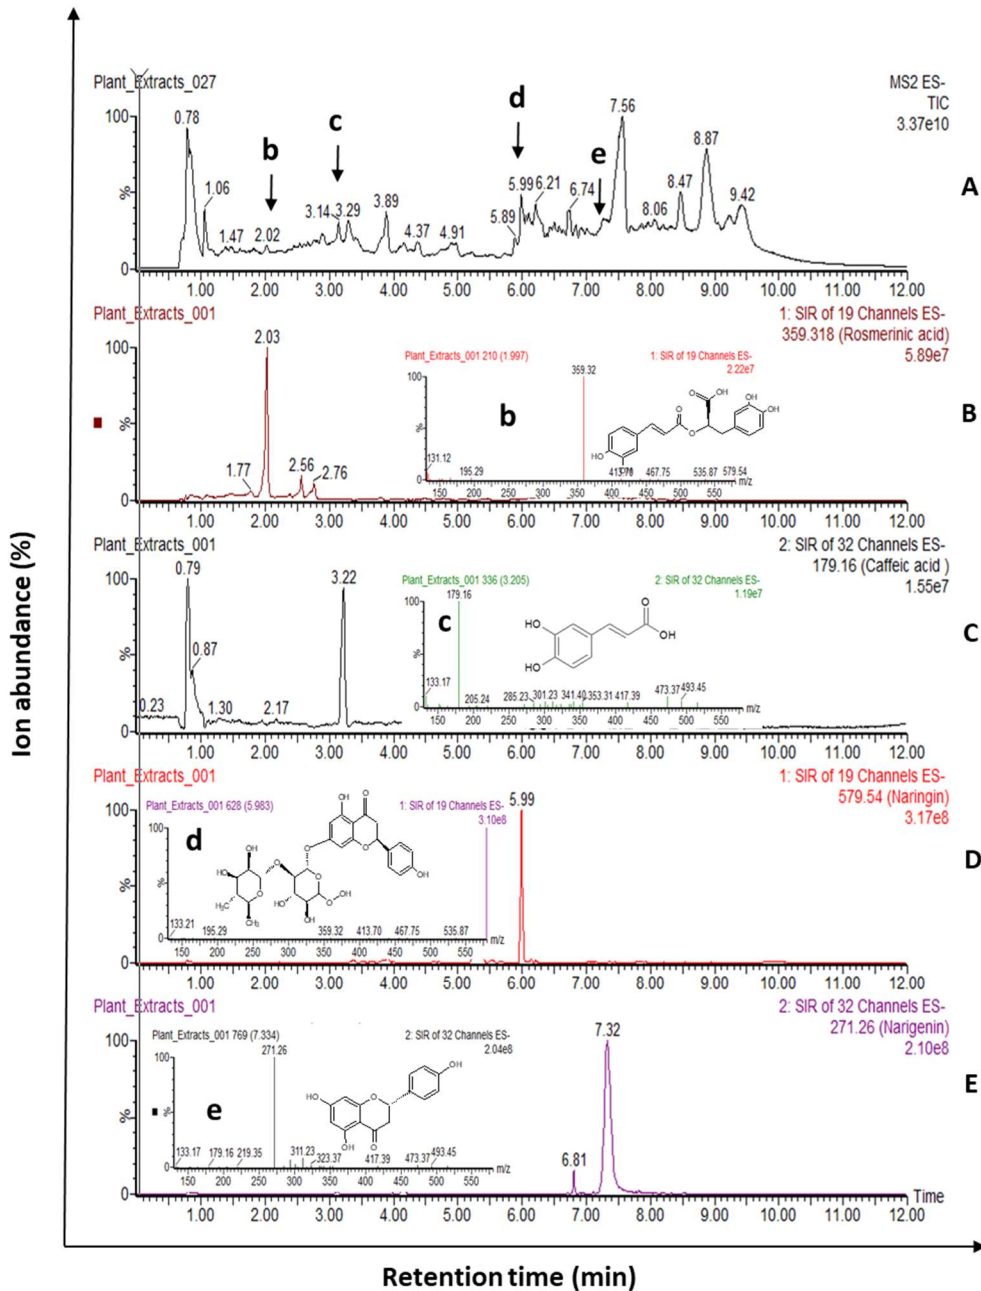

**Figure S1.** (A) The full scan mode total ion chromatogram of barberry root hot water infusion from a negative mode of PLC-ESI-MS/MS analysis. The SIM channels (B,C, D, and E) and mass spectra of the full-scan of selected four major phytochemicals (rosmarinic acid [b], caffeic acid [c], naringin [d], and naringenin [e]) are shown for  $m/z$  of deprotonated ions of 359.32, 179.16, 579.54 and 271.26 respectively. The identified phytochemical name and chemical structure are presented. SIM: Selective ion monitoring scan; TIC: Total ion chromatograms, UPLC-ESI-MS/MS: Ultra-performance liquid chromatographic-electrospray ionization-tandem mass spectrometry.

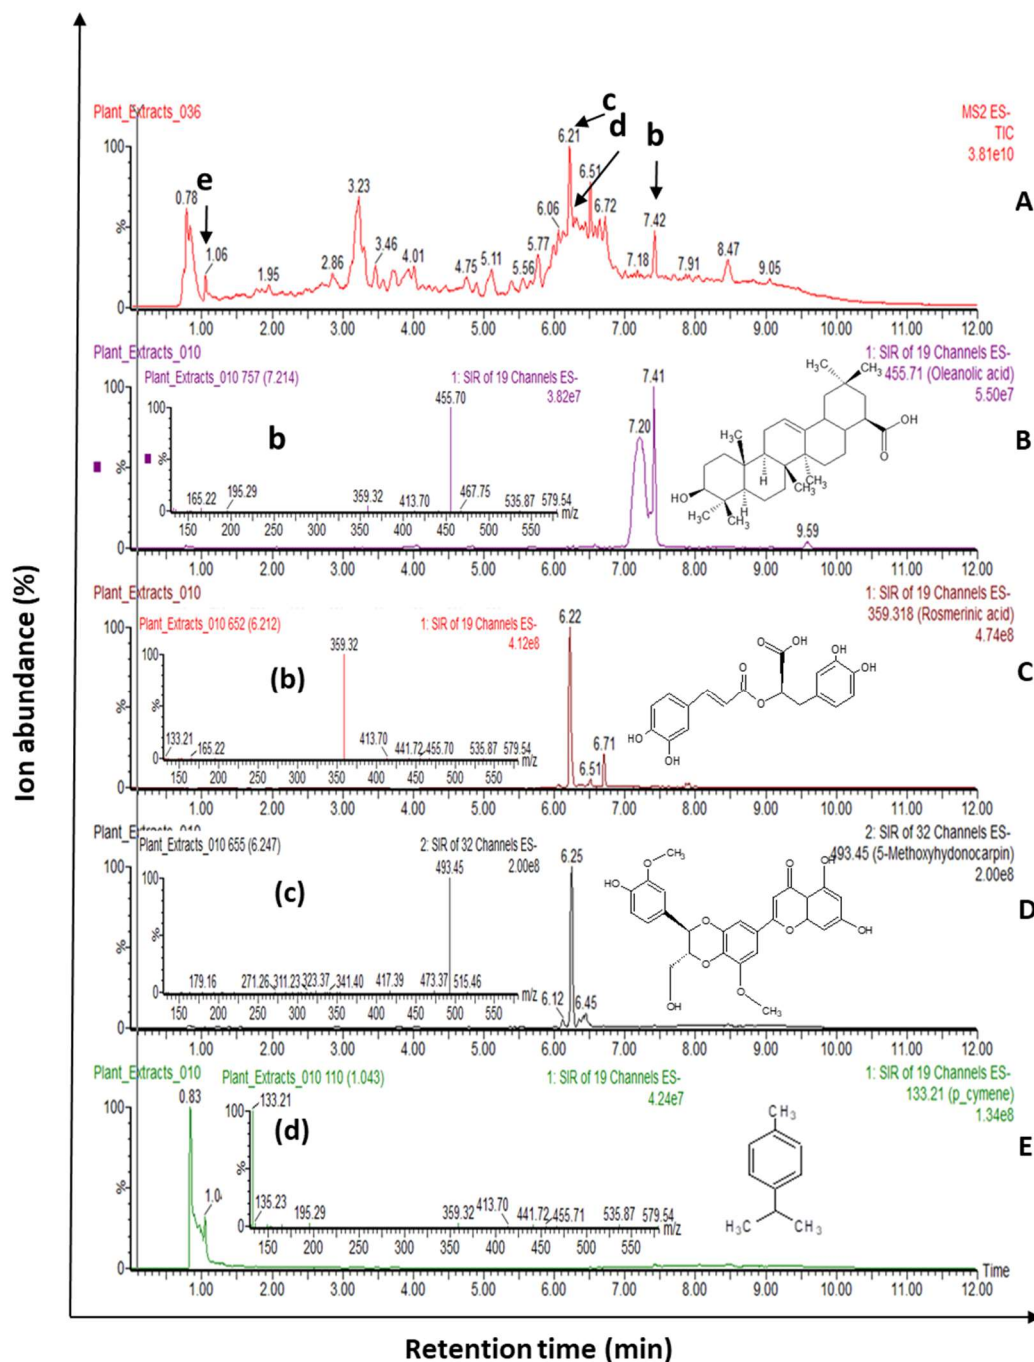

**Figure S2.** (A) The full scan mode total ion chromatogram of oregano flowering shoots hot water infusion from a negative mode of UPLC-ESI-MS/MS analysis. The SIM channels (B, C, D, and E) and mass spectra of the full-scan of selected four major phytochemicals (oleanolic acid [b], rosmarinic acid [c], 5-Methoxyhydnocarpin [d], and p-cymene [e]) are shown for m/z of deprotonated ions of 455.70, 359.32, 493.45 and 133.21 respectively. The identified phytochemical name and chemical structure are presented. SIM: Selective ion monitoring scan; TIC: Total ion chromatograms, UPLC-ESI-MS/MS: Ultra-performance liquid chromatographic-electrospray ionization-tandem mass spectrometry.

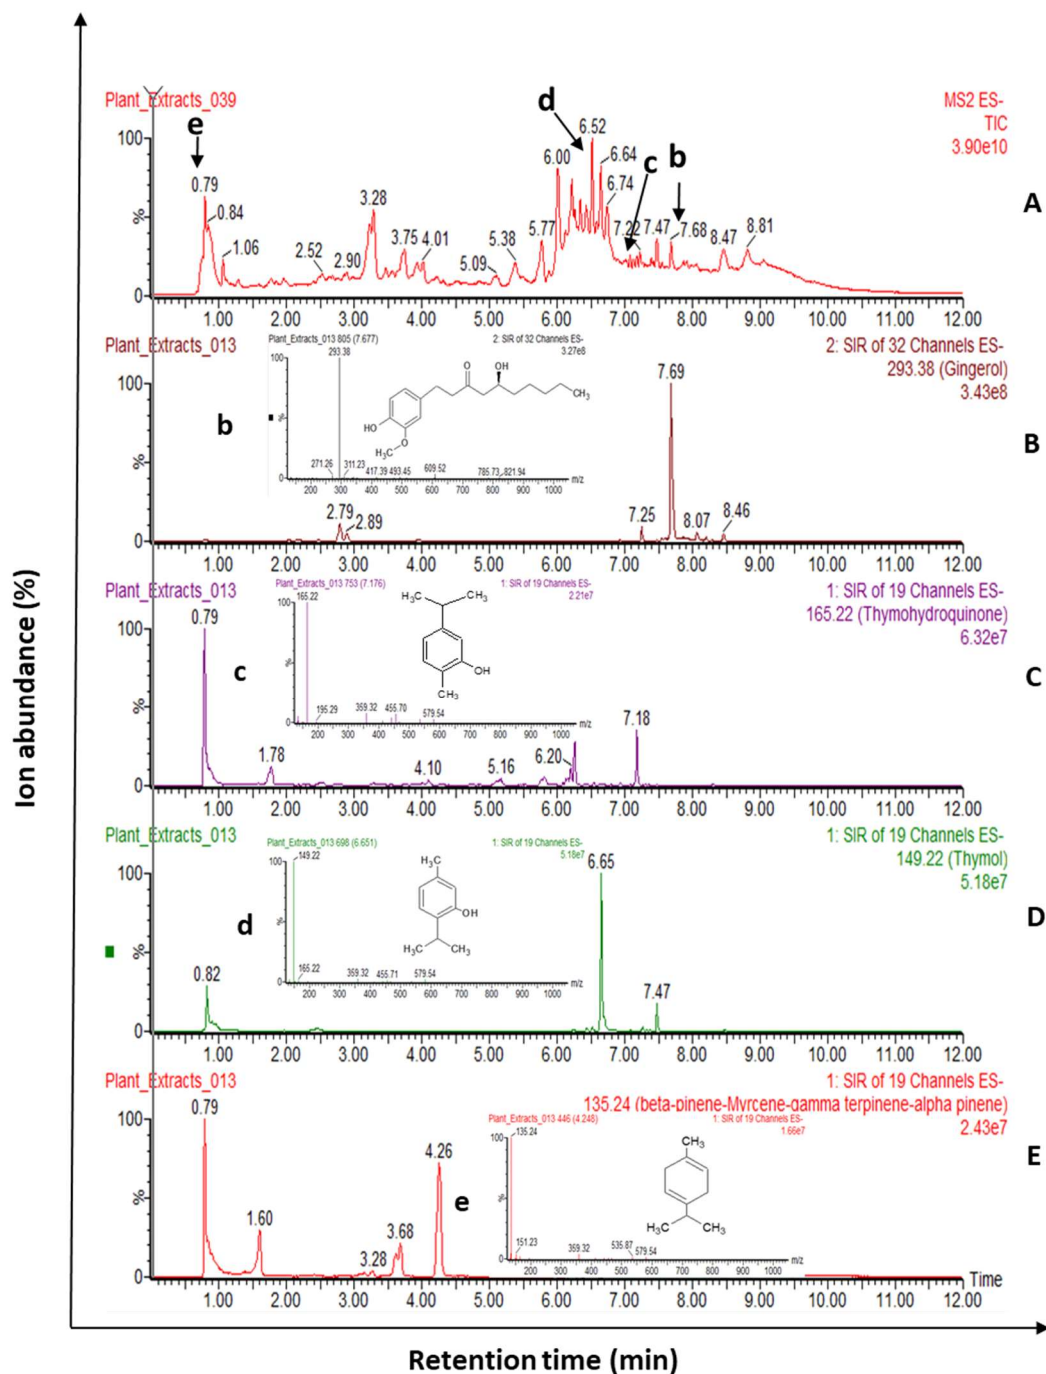

**Figure S3.** (A) The full scan mode total ion chromatogram of thyme flowering shoots hot water infusion from a negative mode of UPLC-ESI-MS/MS analysis. The SIM channels (B, C, D, and E) and mass spectra of the full-scan of selected four major phytochemicals (gingerol [b], thymohydroquinone [c], thymol [d], and  $\alpha$ -pinene [e]) are shown for  $m/z$  of deprotonated ions of 135.24, 149.22, 165.22 and 293.38 respectively. The identified phytochemical name and chemical structure are presented. SIM: Selective ion monitoring scan; TIC: Total ion chromatograms, UPLC-ESI-MS/MS: Ultra-performance liquid chromatographic-electrospray ionization-tandem mass spectrometry.
